# Supplementary material for: Single-cell RNA sequencing analysis identifies acute changes in the tumor microenvironment induced by interferon α gene therapy in a murine bladder cancer model
Source: Front Immunol. 2024 Nov 4;15:1387229. doi: 10.3389/fimmu.2024.1387229 (PMC11570268; doi:10.3389/fimmu.2024.1387229)
Supplement: Supplementary Table 6 — Complete list of differentially expressed pathways between Ad-Ctrl and muAd-Ifnα in the endothelial cell cluster. [file Table6.xls]

## Sheet: Sheet0
© 2000-2024 QIAGEN. All rights reserved.
Ingenuity Canonical Pathways	-log(p-value)	Ratio	z-score	Molecules
PPAR Signaling	4.13	0.121	3.317	FOS,HRAS,IL1B,IL1R2,JUN,MAP4K4,NCOA1,NFKBIA,PDGFA,PDGFB,RAP2A,REL,RELB
Role of Hypercytokinemia/hyperchemokinemia in the Pathogenesis of Influenza	9.23	0.209	3.3	AREG,EIF2AK2,IFIT2,IFIT3,IFNAR2,IL1B,IRF7,IRF9,ISG15,ISG20,OAS1,OAS2,OAS3,PYCARD,RSAD2,STAT1,STAT2,TLR3
Necroptosis Signaling Pathway	4.03	0.103	3	AXL,BIRC2,CYBB,EIF2AK2,IRF9,MLKL,PLA2G4A,PYCARD,SLC25A3,STAT1,STAT2,TLR3,TNFSF10,TOMM40,TSPO,ZBP1
IL-10 Signaling	10.8	0.169	2.746	BHLHE40,CCND1,CREB3L1,FOS,HIF1A,HLA-A,HLA-DMA,HLA-DMB,HLA-DOA,HLA-DQA1,HLA-DQB1,HLA-DRB5,HLA-E,HLA-G,HMOX1,IL1B,IL1R2,IL6R,JUN,MAP4K4,NFKBIA,PBX1,PKM,REL,RELB,STAT1
Pyroptosis Signaling Pathway	2.89	0.108	2.53	CASP4,GBP4,GBP7,IL1B,PRKAR2B,PTGER4,PYCARD,TLR2,TLR3,TXNIP
Nicotine Degradation II	1.57	0.0896	2.449	Aox3,CYP2J2,CYP3A7,FMO1,FMO2,INMT
Cell Cycle: G2/M DNA Damage Checkpoint Regulation	2.83	0.14	2.449	CCNB1,CCNB2,CDK1,CKS1B,CKS2,PLK1,TOP2A
Factors Promoting Cardiogenesis in Vertebrates	2.63	0.085	2.309	BMP4,BMP5,CCND1,CREB3L1,FZD1,PLCB4,TBX5,TGFB2,TGFBR3,WNT10B,WNT2,WNT2B,WNT4
Interferon Signaling	10.1	0.361	2.309	IFI35,IFIT1,IFIT3,IFITM2,IFITM3,IFNAR2,IRF1,IRF9,ISG15,OAS1,SOCS1,STAT1,STAT2
Basal Cell Carcinoma Signaling	2.5	0.111	2.236	BMP4,BMP5,FZD1,PTCH1,WNT10B,WNT2,WNT2B,WNT4
Role of WNT/GSK-3β Signaling in the Pathogenesis of Influenza	1.76	0.0897	2.236	FZD1,NCOA1,NCOA4,WNT10B,WNT2,WNT2B,WNT4
Retinoic acid Mediated Apoptosis Signaling	3.02	0.133	2.121	IRF1,PARP10,PARP11,PARP12,PARP14,PARP3,PARP9,TNFSF10
PPARα/RXRα Activation	2.94	0.0821	2.111	ABCA1,GPD2,HELZ2,HRAS,IL1B,IL1R2,JUN,MAP4K4,NFKBIA,PLCB4,PRKAR2B,RAP2A,REL,RELB,TGFB2,TGFBR3
RHOGDI Signaling	2.81	0.0773	2.111	ACTA2,ACTB,ACTG1,ACTG2,ARHGDIB,ARPC3,CFL1,GNAI2,GNG2,ITGA1,ITGA4,MYH10,MYH11,MYL6,MYL9,RHOB,RND1
CTLA4 Signaling in Cytotoxic T Lymphocytes	0.579	0.0395	2.041	BCL10,CLTB,CTLA4,FCER1G,FOS,H2-Eb2,H2-T22,H2-T24,HLA-A,HLA-DMA,HLA-DMB,HLA-DOA,HLA-DQA1,HLA-DQB1,HLA-DRB5,HLA-E,HLA-G,HMOX1,HRAS,JUN,MALT1,PIK3R5,RAP2A,TGFB2
Phospholipases	0.677	0.058	2	HMOX1,LIPG,PLA2G4A,PLCB4
Purine Nucleotides Degradation II (Aerobic)	2.46	0.211	2	GDA,NT5C3A,PNP,XDH
Serotonin Degradation	0.634	0.0556	2	ADH1C,ALDH1A1,ALDH1B1,Sult1a1
Guanosine Nucleotides Degradation III	3.12	0.308	2	GDA,NT5C3A,PNP,XDH
Ethanol Degradation IV	2.01	0.16	2	ACSS3,ALDH1A1,ALDH1B1,GPX7
Ethanol Degradation II	1.51	0.114	2	ACSS3,ADH1C,ALDH1A1,ALDH1B1
DNA damage-induced 14-3-3σ Signaling	1.15	0.087	2	CASP4,CCNB1,CCNB2,CDK1
Endocannabinoid Cancer Inhibition Pathway	3.27	0.0952	1.941	CASP4,CCND1,CCND3,CREB3L1,DDIT3,GNAI2,HIF1A,NSMAF,NUPR1,PIK3R5,PRKAR2B,SMPD3,VEGFD,VIM
Xenobiotic Metabolism CAR Signaling Pathway	0.907	0.0521	1.897	ALDH1A1,ALDH1B1,CHST2,CYP3A7,FMO1,FMO2,GSTM5,MGST1,NCOA1,RACK1
LXR/RXR Activation	4.09	0.114	1.732	ABCA1,APOD,C4A/C4B,IL1B,IL1R2,LBP,LYZ,MMP9,PLTP,PON3,RBP4,REL,RELB,TLR3
GADD45 Signaling	3.72	0.15	1.667	CCNB1,CCND1,CCND3,CDK1,GADD45B,IL1B,REL,RELB,TGFB2
Immunogenic Cell Death Signaling Pathway	1.06	0.0667	1.633	DDIT3,IFNAR2,IL1B,MLKL,PYCARD,TLR3
p53 Signaling	1.72	0.0816	1.633	BIRC5,CCND1,GADD45B,HIF1A,JUN,PIK3R5,PML,THBS1
Xenobiotic Metabolism AHR Signaling Pathway	2.01	0.092	1.633	ALDH1A1,ALDH1B1,GSTM5,IL1B,MGST1,NCOA1,REL,RELB
PD-1, PD-L1 cancer immunotherapy pathway	3.52	0.112	1.508	H2-Eb2,HLA-A,HLA-DMA,HLA-DMB,HLA-DOA,HLA-DQA1,HLA-DQB1,HLA-DRB5,HLA-E,HLA-G,PIK3R5,TGFB2
HOTAIR Regulatory Pathway	2.83	0.0859	1.508	AR,H3-3A/H3-3B,IRF1,MMP23B,MMP9,NFKBIA,PIK3R5,REL,RELB,VIM,WNT10B,WNT2,WNT2B,WNT4
Neuroprotective Role of THOP1 in Alzheimer's Disease	1.25	0.0661	1.342	C1R,HLA-A,HLA-E,HLA-G,HTRA1,KLK8,MMP9,PRKAR2B
Granzyme A Signaling	0.944	0.0667	1.342	HMGB2,IL1B,LMNB1,NDUFA4L2,Serpinb6b
Retinoate Biosynthesis I	1.86	0.119	1.342	ADH1C,ALDH1A1,DHRS3,RBP1,RBP7
Inhibition of Matrix Metalloproteases	1.99	0.128	1.342	MMP23B,MMP9,THBS2,TIMP2,TIMP3
Cardiac β-adrenergic Signaling	0.783	0.05	1.342	AKAP12,CACNB3,GNAI2,GNG2,PKIB,PKIG,PPP1CA,PPP1R14B,PRKAR2B
Osteoarthritis Pathway	3.72	0.0847	1.291	BGLAP,CASP4,CREB3L1,FGFR1,FZD1,HIF1A,HTRA1,IL1B,IL1R2,ITGA1,ITGA4,MMP9,PTCH1,RARRES2,RBP4,REL,RELB,TIMP3,TLR2,VEGFD
Mitochondrial Dysfunction	1.08	0.0494	1.213	ATP1A2,ATP5F1B,CACNB3,Calm1 (includes others),COX4I1,COX4I2,COX5A,CREB3L1,GPD2,GPX1,GPX7,HAP1,MGST1,NDUFA4L2,PIK3R5,PRKAR2B,TOMM40
Chaperone Mediated Autophagy Signaling Pathway	0	0.0187	1.155	CCND1,EIF4A1,FCER1G,HIF1A,IL1B,LAMP2,MMP23B,MMP9,NFKBIA,PIK3R5,PSMB10,PYCARD
T Cell Exhaustion Signaling Pathway	0.777	0.0423	1.155	CTLA4,FCER1G,FOS,HLA-A,HLA-DMA,HLA-DMB,HLA-DOA,HLA-DQA1,HLA-DQB1,HLA-DRB5,HLA-E,HLA-G,HRAS,IFNAR2,IL12RB2,IL6R,IRF9,JUN,PIK3R5,RAP2A,STAT1,STAT2,STAT4,TGFBR3
Human Embryonic Stem Cell Pluripotency	4.18	0.0945	1.147	BMP4,BMP5,FGFR1,FZD1,HRAS,ID3,INHBA,KLF4,LIFR,NTRK1,PDGFA,PDGFB,PIK3R5,RAP2A,TGFB2,WNT10B,WNT2,WNT2B,WNT4
Role of Pattern Recognition Receptors in Recognition of Bacteria and Viruses	5.77	0.122	1.134	CD70,EIF2AK2,IFIH1,IL1B,IRF7,OAS1,OAS2,OAS3,OSM,PIK3R5,REL,RELB,RNASEL,TGFB2,TLR2,TLR3,TNFSF10,TNFSF13B,TNFSF4
IL-15 Production	1.59	0.0732	1.134	AXL,FGFR1,FLT1,IRF1,MST1R,NTRK1,REL,RELB,STAT1
Regulation Of The Epithelial Mesenchymal Transition In Development Pathway	2.54	0.103	1.134	FZD1,HIF1A,PTCH1,REL,RELB,WNT10B,WNT2,WNT2B,WNT4
CLEAR Signaling Pathway	1.18	0.0526	1.069	CREB3L1,FGFR1,FLT1,HIF1A,HRAS,IGF2R,NTRK1,PDGFB,PML,RAP2A,SCPEP1,TGFB2,TGFBR3,TLR2,TLR3
Amyotrophic Lateral Sclerosis Signaling	0.438	0.0431	1	BIRC2,CACNB3,GPX1,PIK3R5,VEGFD
Coagulation System	1.51	0.114	1	F3,F8,SERPINE1,THBD
PXR/RXR Activation	0.739	0.0615	1	ALDH1A1,CYP3A7,NCOA1,PRKAR2B
Role of RIG1-like Receptors in Antiviral Innate Immunity	3.05	0.152	1	DHX58,IFIH1,IRF7,NFKBIA,REL,RELB,TRIM25
ATM Signaling	1.25	0.07	1	CCNB1,CCNB2,CDK1,CREB3L1,GADD45B,JUN,NFKBIA
Transcriptional Regulatory Network in Embryonic Stem Cells	3.78	0.0976	1	BMP4,FGFR1,FZD1,HRAS,IGF2R,INHBA,KLF4,LIFR,PIK3R5,RAP2A,TGFB2,TGFBR3,WNT10B,WNT2,WNT2B,WNT4
Retinol Biosynthesis	1.12	0.0851	1	DHRS3,LIPG,RBP1,RBP7
Apelin Cardiac Fibroblast Signaling Pathway	2.15	0.174	1	APLN,CCN2,SERPINE1,TGFB2
NAD Signaling Pathway	1.83	0.0728	0.905	HIF1A,LDHA,PARP10,PARP11,PARP12,PARP14,PARP3,PARP9,PDGFB,PIK3R5,TGFB2
Neuroinflammation Signaling Pathway	8.92	0.11	-0.928	BIRC2,BIRC5,CD40,CREB3L1,CYBB,FOS,FZD1,H2-Eb2,HLA-A,HLA-DMA,HLA-DMB,HLA-DOA,HLA-DQA1,HLA-DQB1,HLA-DRB5,HLA-E,HLA-G,HMOX1,IL1B,IL6R,IRF7,JUN,MMP9,NCF1,PIK3R5,PLA2G4A,PYCARD,REL,RELB,STAT1,TGFB2,TGFBR3,TLR2,TLR3,VCAM1
CSDE1 Signaling Pathway	0.905	0.0714	-1	CCND3,FOS,TNC,VIM
Role Of Osteoblasts In Rheumatoid Arthritis Signaling Pathway	5.94	0.102	-1	BGLAP,BMP4,CD70,CTSC,FZD1,IGF2R,IL1B,IL6R,MMP23B,MMP9,OSM,PIK3R5,SFRP2,STAT1,STAT2,STAT4,TGFB2,TNFSF10,TNFSF13B,TNFSF4,VEGFD,WNT10B,WNT2,WNT2B,WNT4
Huntington's Disease Signaling	0.966	0.0495	-1	ATP5F1B,CASP4,CLTB,CREB3L1,GNG2,HAP1,HRAS,JUN,NTRK1,PIK3R5,PLCB4,PSMB10,UBD,UBE2S
Melatonin Signaling	0.634	0.0556	-1	Calm1 (includes others),GNAI2,PLCB4,PRKAR2B
Neuropathic Pain Signaling In Dorsal Horn Neurons	0.342	0.0396	-1	FOS,PIK3R5,PLCB4,PRKAR2B
Role of NANOG in Mammalian Embryonic Stem Cell Pluripotency	2.45	0.0887	-1	BMP4,BMP5,FZD1,HRAS,LIFR,PIK3R5,RAP2A,WNT10B,WNT2,WNT2B,WNT4
ERK5 Signaling	0.962	0.0676	-1	CREB3L1,FOS,HRAS,NTRK1,RAP2A
G Protein Signaling Mediated by Tubby	0	0.00855	-1	FCER1G,GNAI2,GNG2,PLCB4
April Mediated Signaling	2.54	0.143	-1	FOS,JUN,NFKBIA,REL,RELB,TRAF1
TNFR1 Signaling	2.12	0.118	-1	BIRC2,FOS,JUN,NFKBIA,REL,RELB
OX40 Signaling Pathway	0.43	0.0377	-1	FCER1G,H2-Eb2,H2-T22,H2-T24,HLA-A,HLA-DMA,HLA-DMB,HLA-DOA,HLA-DQA1,HLA-DQB1,HLA-DRB5,HLA-E,HLA-G,JUN,NFKBIA,REL,RELB,TNFSF4
MIF-mediated Glucocorticoid Regulation	2.9	0.167	-1	CD74,MIF,NFKBIA,PLA2G4A,REL,RELB
Telomerase Signaling	0.295	0.037	-1	ELF1,HRAS,PIK3R5,RAP2A
iNOS Signaling	4.59	0.191	-1	Calm1 (includes others),FOS,IRF1,JUN,LBP,NFKBIA,REL,RELB,STAT1
Antioxidant Action of Vitamin C	1.02	0.0614	-1	HMOX1,NFKBIA,PLA2G4A,PLCB4,REL,RELB,TXNRD1
Chemokine Signaling	2.75	0.111	-1	Calm1 (includes others),CCL11,CFL1,FOS,GNAI2,HRAS,JUN,PLCB4,RAP2A
GPCR-Mediated Integration of Enteroendocrine Signaling Exemplified by an L Cell	0.594	0.0533	-1	CCK,GNAI2,PLCB4,PRKAR2B
Macropinocytosis Signaling	1.34	0.0789	-1	CSF1,HRAS,PDGFA,PDGFB,PIK3R5,RAP2A
SPINK1 General Cancer Pathway	0.677	0.058	-1	HRAS,IL6R,PIK3R5,RAP2A
Apelin Pancreas Signaling Pathway	2.34	0.13	-1	APLN,DDIT3,PIK3R5,PRKAR2B,REL,RELB
Opioid Signaling Pathway	1.49	0.0571	-1.069	CACNB3,Calm1 (includes others),CLTB,CREB3L1,FOS,FOSB,GNAI2,GNG2,HRAS,NFKBIA,PRKAR2B,RAP2A,RGS10,RGS16,RGS5,SIGMAR1
IL-13 Signaling Pathway	0.987	0.0603	-1.134	CCL11,JUN,PDGFA,PIK3R5,SOCS1,STAT1,TGFB2
Macrophage Alternative Activation Signaling Pathway	10.2	0.148	-1.134	ABCA1,CCL17,CIITA,CLEC10A,CREB3L1,CSF1,CXCL13,FCER1G,FOS,H3-3A/H3-3B,HLA-DMA,HLA-DMB,HLA-DOA,HLA-DQA1,HLA-DQB1,HLA-DRB5,IL1B,IL1R2,JUN,KLF4,NFKBIA,PIK3R5,REL,RELB,SOCS1,STAT1,TGFB2,THBS1
IL-3 Signaling	1.73	0.0886	-1.134	FOS,HRAS,IL3RA,JUN,PIK3R5,RAP2A,STAT1
Thrombin Signaling	1.33	0.0578	-1.134	GATA5,GNAI2,GNG2,HRAS,MYL6,MYL9,PIK3R5,PLCB4,RAP2A,REL,RELB,RHOB,RND1
Type I Diabetes Mellitus Signaling	0.419	0.0373	-1.134	FCER1G,H2-Eb2,HLA-A,HLA-DMA,HLA-DMB,HLA-DOA,HLA-DQA1,HLA-DQB1,HLA-DRB5,HLA-E,HLA-G,IL1B,IRF1,NFKBIA,REL,RELB,SOCS1,SOCS2,STAT1
AMPK Signaling	0.681	0.0455	-1.134	ACTB,ADRA2A,CCNA2,CCND1,CREB3L1,GNAI2,GNG2,PFKFB3,PFKL,PIK3R5,PRKAR2B
Cyclins and Cell Cycle Regulation	1.58	0.0824	-1.134	CCNA2,CCNB1,CCNB2,CCND1,CCND3,CDK1,TGFB2
VEGF Family Ligand-Receptor Interactions	1.6	0.0833	-1.134	FLT1,FOS,HRAS,PIK3R5,PLA2G4A,RAP2A,VEGFD
Superpathway of Inositol Phosphate Compounds	0.39	0.0385	-1.134	ATP1A2,DUSP2,DUSP28,NOCT,PIK3R5,PLCB4,PPP1CA,PPP1R14B,PTPN1
Insulin Receptor Signaling	0.69	0.05	-1.134	HRAS,PIK3R5,PPP1CA,PPP1R14B,PRKAR2B,PTPN1,RAP2A
Th17 Activation Pathway	0	0.0186	-1.134	FCER1G,HIF1A,IL12RB2,IL1B,IL6R,PTGER4,REL,RELB,STAT4
BEX2 Signaling Pathway	2.71	0.11	-1.134	CCND1,HIF1A,JUN,LGALS1,NFKBIA,REL,RELB,SWAP70,VEGFD
GM-CSF Signaling	2.01	0.1	-1.134	CCND1,CISH,HRAS,PIK3R5,RACK1,RAP2A,STAT1
Pathogen Induced Cytokine Storm Signaling Pathway	14.6	0.129	-1.155	BHLHE40,CCL11,CCL17,Ccl2,Ccl7,Ccl8,CD70,CIITA,COL13A1,COL4A2,COL5A3,COL6A3,CXCL13,CXCL16,CXCL2,Cxcl9,DHX58,FOS,HLA-DMA,HLA-DMB,HLA-DOA,HLA-DQA1,HLA-DQB1,HLA-DRB5,IFIH1,IFNAR2,IL12RB2,IL1B,IL1R2,IL6R,IRF1,IRF7,IRF9,JUN,MLKL,OSM,PYCARD,SPI1,STAT1,STAT4,TGFB2,TLR2,TLR3,TNFSF10,TNFSF13B,TNFSF4,VEGFD,ZBP1
Synaptogenesis Signaling Pathway	0.904	0.0476	-1.155	ARPC3,CACNB3,Calm1 (includes others),CFL1,CREB3L1,EPHA7,HRAS,NAP1L1,NLGN2,PIK3R5,PRKAR2B,RAP2A,RASGRP2,THBS1,THBS2
Acute Phase Response Signaling	8.31	0.135	-1.291	C1R,C2,C4A/C4B,CFB,CP,F8,FOS,HMOX1,HRAS,IL1B,IL6R,JUN,LBP,NFKBIA,OSM,RAP2A,RBP1,RBP4,RBP7,REL,RELB,SERPINE1,SERPING1,SOCS1,SOCS2
MSP-RON Signaling In Cancer Cells Pathway	5.84	0.129	-1.291	ACTA2,CCND1,CREB3L1,ELF1,FOS,HIF1A,HRAS,IL3RA,JUN,KLK8,MST1R,NFKBIA,PIK3R5,RAP2A,REL,RELB,VEGFD,VIM
Neuregulin Signaling	0.972	0.0598	-1.342	AREG,BTC,HRAS,ITGA1,ITGA4,RAP2A,RPS6
Fc Epsilon RI Signaling	0.422	0.0424	-1.342	FCER1G,HRAS,PIK3R5,PLA2G4A,RAP2A
VDR/RXR Activation	3.5	0.128	-1.342	BGLAP,COL13A1,IGFBP5,IGFBP6,KLF4,NCOA1,PDGFA,TGFB2,THBD,VDR
Ceramide Signaling	2.4	0.0989	-1.342	FOS,HRAS,JUN,NSMAF,PIK3R5,RAP2A,REL,RELB,SMPD3
NF-κB Activation by Viruses	1.76	0.0897	-1.342	EIF2AK2,HRAS,NFKBIA,PIK3R5,RAP2A,REL,RELB
Angiopoietin Signaling	2.36	0.105	-1.342	ANGPTL1,BIRC5,HRAS,NFKBIA,PIK3R5,RAP2A,REL,RELB
Corticotropin Releasing Hormone Signaling	0.822	0.0526	-1.342	CACNB3,Calm1 (includes others),CREB3L1,FOS,GNAI2,JUN,PRKAR2B,PTCH1
TNFR2 Signaling	4.07	0.219	-1.342	BIRC2,FOS,JUN,NFKBIA,REL,RELB,TRAF1
eNOS Signaling	0.779	0.0513	-1.342	Calm1 (includes others),CCNA2,CNGB3,FLT1,NOSTRIN,PIK3R5,PRKAR2B,VEGFD
D-myo-inositol (1,4,5,6)-Tetrakisphosphate Biosynthesis	0.378	0.0389	-1.342	ATP1A2,DUSP2,DUSP28,NOCT,PPP1CA,PPP1R14B,PTPN1
D-myo-inositol (3,4,5,6)-tetrakisphosphate Biosynthesis	0.378	0.0389	-1.342	ATP1A2,DUSP2,DUSP28,NOCT,PPP1CA,PPP1R14B,PTPN1
3-phosphoinositide Degradation	0.318	0.0366	-1.342	ATP1A2,DUSP2,DUSP28,NOCT,PPP1CA,PPP1R14B,PTPN1
UVC-Induced MAPK Signaling	1.53	0.098	-1.342	FOS,HRAS,JUN,RAP2A,SMPD3
EGF Signaling	1.38	0.0893	-1.342	FOS,HRAS,JUN,PIK3R5,STAT1
Nitric Oxide Signaling in the Cardiovascular System	0.641	0.05	-1.342	CACNB3,Calm1 (includes others),FLT1,PIK3R5,PRKAR2B,VEGFD
Chronic Myeloid Leukemia Signaling	5.91	0.0971	-1.347	ADAR,AURKB,BIRC5,Calm1 (includes others),CCND1,CCND3,FOS,FZD1,HRAS,IRF8,JUN,KLF4,MMP9,NOTCH3,PIK3R5,PLCB4,PLK1,PTCH1,RAP2A,REL,RELB,TGFB2,TNFSF10,WNT10B,WNT2,WNT2B,WNT4
Oxytocin In Brain Signaling Pathway	2.06	0.0704	-1.387	CACNB3,Calm1 (includes others),CREB3L1,DDIT3,GNAI2,GNG2,HRAS,IL1B,PIK3R5,PLA2G4A,PTGS1,PTPN1,PYCARD,RAP2A
Kinetochore Metaphase Signaling Pathway	4.58	0.126	-1.387	AURKB,BIRC5,CCNB1,CDC20,CDCA8,CDK1,CENPA,CENPE,MXD3,PLK1,PPP1CA,PPP1R14B,PTTG1,SPC24
Systemic Lupus Erythematosus In T Cell Signaling Pathway	0.665	0.0404	-1.4	CASP4,CD70,CREB3L1,CREM,ELF1,FCER1G,FOS,GNAI2,H2-Eb2,H2-T22,H2-T24,HLA-A,HLA-DMA,HLA-DMB,HLA-DOA,HLA-DQA1,HLA-DQB1,HLA-DRB5,HLA-E,HLA-G,HRAS,JUN,PIK3R5,RAP2A,RHOB,RND1
Sphingosine-1-phosphate Signaling	2.09	0.0833	-1.414	ASAH2,CASP4,GNAI2,PDGFA,PDGFB,PIK3R5,PLCB4,RHOB,RND1,SMPD3
Erythropoietin Signaling Pathway	5.52	0.113	-1.414	BIRC2,CCND1,CD70,FOS,HBA1/HBA2,HBB,HIF1A,HRAS,IL1B,JUN,NFKBIA,OSM,PIK3R5,RAP2A,REL,RELB,TGFB2,TNFSF10,TNFSF13B,TNFSF4
Activin Inhibin Signaling Pathway	2.47	0.0737	-1.5	CCN2,COL5A3,FOS,FOSB,IL1B,IL1R2,INHBA,JUN,NFKBIA,PIK3R5,SERPINE1,TGFB2,TGFBR3,TLR2,TLR3,TNFSF13B
fMLP Signaling in Neutrophils	3.25	0.0992	-1.508	ARPC3,Calm1 (includes others),CYBB,GNAI2,GNG2,HRAS,NCF1,NFKBIA,PIK3R5,PLCB4,RAP2A,REL,RELB
Natural Killer Cell Signaling	2.87	0.0808	-1.604	CD48,CFL1,COL5A3,FCER1G,HLA-A,HLA-E,HLA-G,HRAS,IL12RB2,MICB,PIK3R5,RAP2A,REL,RELB,STAT4,TNFSF10
Estrogen Receptor Signaling	2.4	0.0611	-1.606	ATP5F1B,CACNB3,CCND1,CFL1,CREB3L1,FOS,GNAI2,GNG2,HIF1A,HRAS,IGF2R,JUN,MMP23B,MMP9,MYL6,MYL9,NCOA1,NDUFA4L2,PIK3R5,PLCB4,PRKAR2B,RAP2A,REL,RELB,VEGFD
LPS/IL-1 Mediated Inhibition of RXR Function	2.15	0.0667	-1.633	ABCA1,ALDH1A1,ALDH1B1,CHST2,CYP2J2,CYP3A7,FABP5,FMO1,FMO2,GSTM5,IL1B,IL1R2,JUN,LBP,MGST1,NCOA1,PLTP
MIF Regulation of Innate Immunity	3.97	0.182	-1.633	CD74,FOS,JUN,MIF,NFKBIA,PLA2G4A,REL,RELB
CD40 Signaling	3.35	0.134	-1.633	CD40,FOS,JUN,NFKBIA,PIK3R5,PTGS1,REL,RELB,TRAF1
Thrombopoietin Signaling	1.69	0.0952	-1.633	FOS,HRAS,JUN,PIK3R5,RAP2A,STAT1
p70S6K Signaling	0	0.0103	-1.633	GNAI2,HRAS,PIK3R5,PLCB4,RAP2A,RPS6
Ovarian Cancer Signaling	2.51	0.0823	-1.633	CCND1,FZD1,HRAS,MMP9,PIK3R5,PRKAR2B,PTGS1,RAP2A,VEGFD,WNT10B,WNT2,WNT2B,WNT4
RANK Signaling in Osteoclasts	2.4	0.0989	-1.633	BIRC2,Calm1 (includes others),FOS,GSN,JUN,NFKBIA,PIK3R5,REL,RELB
3-phosphoinositide Biosynthesis	0.389	0.0388	-1.633	ATP1A2,DUSP2,DUSP28,NOCT,PIK3R5,PPP1CA,PPP1R14B,PTPN1
IL-23 Signaling Pathway	3.83	0.174	-1.633	HIF1A,IL12RB2,IL1B,NFKBIA,PIK3R5,REL,RELB,STAT4
Cholecystokinin/Gastrin-mediated Signaling	2.11	0.084	-1.667	CCK,CREM,FOS,HRAS,IL1B,JUN,PLCB4,RAP2A,RHOB,RND1
Prolactin Signaling	3.4	0.116	-1.667	FOS,HRAS,IRF1,JUN,KCNJ8,NMI,PIK3R5,RAP2A,SOCS1,SOCS2,STAT1
RAC Signaling	3.06	0.0949	-1.667	ARPC3,CFL1,CYBB,HRAS,IQGAP2,ITGA1,ITGA4,JUN,NCF1,PIK3R5,RAP2A,REL,RELB
P2Y Purigenic Receptor Signaling Pathway	2.68	0.0902	-1.667	CREB3L1,FOS,GNAI2,GNG2,HRAS,JUN,PIK3R5,PLCB4,PRKAR2B,RAP2A,REL,RELB
PDGF Signaling	2.54	0.103	-1.667	EIF2AK2,FOS,HRAS,JUN,PDGFA,PDGFB,PIK3R5,RAP2A,STAT1
HER-2 Signaling in Breast Cancer	2.66	0.0749	-1.698	AREG,BIRC5,CCND1,COX4I1,COX4I2,COX5A,ELF1,FCER1G,FOS,HRAS,JUN,NFKBIA,PIK3R5,RAP2A,REL,RELB,RPS6
Th2 Pathway	5.98	0.131	-1.698	CD40,H2-Eb2,HLA-A,HLA-DMA,HLA-DMB,HLA-DOA,HLA-DQA1,HLA-DQB1,HLA-DRB5,IL12RB2,JUN,NOTCH3,PIK3R5,RUNX3,SPI1,STAT4,TGFBR3,TNFSF4
HIF1α Signaling	5.53	0.106	-1.706	CYBB,FLT1,HIF1A,HMOX1,HRAS,IL6R,JUN,LDHA,MMP23B,MMP9,NCF1,NCOA1,PDGFB,PIK3R5,PKM,RACK1,RAP2A,RPS6,SERPINE1,TGFB2,VEGFD,VIM
FAK Signaling	0	0.0327	-1.715	ACKR3,ADRA2A,ARPC3,CALCRL,CCND1,CCR7,CCRL2,COL5A3,ECM1,ELF1,FCER1G,FLT1,FOS,FZD1,GPR132,GPR183,GPRC5B,HRAS,IL12RB2,IL1R2,IL3RA,IL6R,ITGA1,ITGA4,JUN,MMP9,NPY1R,PIK3R5,PTGER4,RAP2A,SOCS1,SOCS2,TGFB2,TGFBR3
IL-33 Signaling Pathway	1.57	0.0645	-1.732	AREG,CASP4,CCL17,CREB3L1,FOS,IL1B,JUN,MMP9,NFKBIA,PIK3R5,PRKAR2B,VCAM1
Adipogenesis pathway	2.52	0.0863	-1.732	BMP4,DDIT3,FGFR1,FZD1,HIF1A,KLF3,NOCT,NR1D1,RBP1,RUNX1T1,TXNIP,WNT10B
ABRA Signaling Pathway	10.5	0.217	-1.789	ACTA2,ACTB,ACTG1,ACTG2,ACTN1,CCN2,CFL1,FOS,FOSB,GSN,JUNB,MMP9,MYH11,MYL9,PPP1CA,TAGLN,Tpm1,Tpm2,Tpm4,VEGFD
Macrophage Classical Activation Signaling Pathway	12.4	0.164	-1.826	CD40,CD70,CIITA,CYBB,GBP4,HIF1A,HLA-DMA,HLA-DMB,HLA-DOA,HLA-DQA1,HLA-DQB1,HLA-DRB5,IFNAR2,IL1B,IRF1,IRF8,IRF9,LBP,NFKBIA,OSM,PARP14,PARP9,PKM,SOCS1,SPI1,STAT1,STAT2,TGFB2,TNFSF10,TNFSF13B,TNFSF4
IL-8 Signaling	4.93	0.1	-1.886	CCND1,CCND3,CYBB,FLT1,FOS,GNAI2,GNG2,HMOX1,HRAS,JUN,MAP4K4,MMP9,MYL9,NCF1,NFKBIA,PIK3R5,RAP2A,RHOB,RND1,VCAM1,VEGFD
SNARE Signaling Pathway	0.733	0.0515	-1.89	CACNB3,Calm1 (includes others),MYH10,MYH11,MYL6,MYL9,PRKAR2B
14-3-3-mediated Signaling	1.92	0.0787	-1.89	FOS,HRAS,JUN,PIK3R5,PLCB4,RAP2A,TUBA1A,TUBB,TUBB3,VIM
Fcγ Receptor-mediated Phagocytosis in Macrophages and Monocytes	1.37	0.0745	-1.89	ACTA2,ACTB,ACTG1,ACTG2,ARPC3,HMOX1,NCF1
Relaxin Signaling	1.39	0.0645	-1.89	FOS,GNAI2,GNG2,JUN,MMP9,NFKBIA,PIK3R5,PRKAR2B,REL,RELB
Glioma Signaling	1.55	0.072	-1.89	Calm1 (includes others),CCND1,CCND3,HRAS,IGF2R,PDGFA,PDGFB,PIK3R5,RAP2A
Thyroid Cancer Signaling	1.73	0.0886	-1.89	CCND1,FOS,HRAS,JUN,NTRK1,PIK3R5,RAP2A
mTOR Signaling	4.81	0.0981	-1.89	EIF3I,EIF4A1,HIF1A,HMOX1,HRAS,PIK3R5,RAP2A,RHOB,RND1,RPS11,RPS15,RPS17,RPS2,RPS25,RPS28,RPS29,RPS3,RPS6,RPS9,RPSA,VEGFD
ERBB Signaling	1.4	0.0753	-1.89	AREG,BTC,FOS,HRAS,JUN,PIK3R5,RAP2A
Apelin Cardiomyocyte Signaling Pathway	1.27	0.0707	-1.89	APLN,GNAI2,HIF1A,MYL6,MYL9,PIK3R5,PLCB4
White Adipose Tissue Browning Pathway	0.994	0.058	-1.89	CACNB3,CREB3L1,FCER1G,FGFR1,HOXC9,LDHA,PRKAR2B,RUNX1T1
Phospholipase C Signaling	0	0.0152	-1.897	Calm1 (includes others),CREB3L1,FCER1G,GNG2,HMOX1,HRAS,ITGA1,ITGA4,MYL6,MYL9,PLA2G4A,PLCB4,RAP2A,REL,RELB,RHOB,RND1
Role of NFAT in Cardiac Hypertrophy	0.832	0.0491	-1.897	CACNB3,Calm1 (includes others),GNAI2,GNG2,HRAS,IL6R,PIK3R5,PLCB4,PRKAR2B,RAP2A,TGFB2
CCR5 Signaling in Macrophages	0	0.014	-2	CACNB3,Calm1 (includes others),FCER1G,FOS,GNAI2,GNG2,JUN
Cardiac Hypertrophy Signaling	2.4	0.069	-2	ADRA2A,CACNB3,Calm1 (includes others),GNAI2,GNG2,HRAS,HSPB1,IL6R,JUN,MYL6,MYL9,PIK3R5,PLCB4,PRKAR2B,RAP2A,RHOB,RND1,TGFB2
Melanocyte Development and Pigmentation Signaling	0.612	0.051	-2	CREB3L1,HRAS,PIK3R5,PRKAR2B,RAP2A
Antiproliferative Role of Somatostatin Receptor 2	0.569	0.0519	-2	GNG2,HRAS,PIK3R5,RAP2A
Melanoma Signaling	1.04	0.08	-2	CCND1,HRAS,PIK3R5,RAP2A
Small Cell Lung Cancer Signaling	2.25	0.0938	-2	BIRC2,CCND1,CCND3,CKS1B,NFKBIA,PIK3R5,REL,RELB,TRAF1
Endometrial Cancer Signaling	0.827	0.0667	-2	CCND1,HRAS,PIK3R5,RAP2A
Non-Small Cell Lung Cancer Signaling	0.659	0.0532	-2	CCND1,CCND3,HRAS,PIK3R5,RAP2A
IL-1 Signaling	1.77	0.0833	-2	FOS,GNAI2,GNG2,JUN,NFKBIA,PRKAR2B,REL,RELB
ERBB4 Signaling	0.692	0.0588	-2	HRAS,Nrg1,PIK3R5,RAP2A
Gαs Signaling	0.85	0.0556	-2	ADD3,CNGB3,CREB3L1,GNAI2,GNG2,PRKAR2B,PTGER4
Oxidative Phosphorylation	0.277	0.036	-2	ATP5F1B,COX4I1,COX4I2,COX5A
Hypoxia Signaling in the Cardiovascular System	2.36	0.105	-2	CREB3L1,HIF1A,JUN,LDHA,NFKBIA,UBE2C,UBE2L6,UBE2S
Regulation Of The Epithelial Mesenchymal Transition By Growth Factors Pathway	3.95	0.0938	-2	CD70,FGFR1,FOS,HRAS,IL6R,JUN,MMP9,PDGFA,PDGFB,PIK3R5,RAP2A,REL,RELB,TGFB2,TNFSF10,TNFSF13B,TNFSF4,VIM
Calcium Signaling	1.71	0.0636	-2	ACTA2,CACNB3,Calm1 (includes others),CREB3L1,MYH10,MYH11,MYL6,MYL9,PRKAR2B,RAP2A,Tpm1,Tpm2,Tpm4,TRPC6
T Cell Receptor Signaling	0.665	0.0406	-2.041	BCL10,Calm1 (includes others),CTLA4,FCER1G,FOS,H2-Eb2,H2-T22,H2-T24,HLA-A,HLA-DMA,HLA-DMB,HLA-DOA,HLA-DQA1,HLA-DQB1,HLA-DRB5,HLA-E,HLA-G,HRAS,JUN,MALT1,NFKBIA,PIK3R5,RAP2A,REL,RELB
MicroRNA Biogenesis Signaling Pathway	1.24	0.0588	-2.111	ADAR,BMP4,HMOX1,HRAS,PDGFB,PIK3R5,PNPT1,RAP2A,TGFB2,TUT4,TUT7
Adrenomedullin signaling pathway	1.7	0.0653	-2.111	CALCRL,Calm1 (includes others),FOS,HIF1A,HRAS,IL1B,PIK3R5,PLCB4,PRKAR2B,RAMP3,RAP2A,REL,RELB
Apelin Endothelial Signaling Pathway	3.46	0.0993	-2.111	APLN,Calm1 (includes others),FOS,GNAI2,GNG2,HIF1A,HRAS,JUN,PIK3R5,PLCB4,RAP2A,REL,RELB,VCAM1
CD28 Signaling in T Helper Cells	0.498	0.0387	-2.121	ARPC3,BCL10,Calm1 (includes others),CTLA4,FCER1G,FOS,H2-Eb2,HLA-A,HLA-DMA,HLA-DMB,HLA-DOA,HLA-DQA1,HLA-DQB1,HLA-DRB5,JUN,MALT1,NFKBIA,PIK3R5,REL,RELB
GNRH Signaling	1.84	0.0681	-2.121	CACNB3,Calm1 (includes others),CREB3L1,FOS,GNAI2,GNG2,HRAS,JUN,PLCB4,PRKAR2B,RAP2A,REL,RELB
SAPK/JNK Signaling	0	0.0159	-2.121	DAXX,FCER1G,GNG2,HRAS,JUN,MAP4K4,PIK3R5,RAP2A
IGF-1 Signaling	3.03	0.105	-2.121	CCN2,FOS,HRAS,IGFBP5,IGFBP6,JUN,PIK3R5,PRKAR2B,RAP2A,SOCS1,SOCS2
IL-17 Signaling	3.6	0.0909	-2.183	CCL11,CCL17,CD70,FOS,HRAS,IL1B,JUN,MMP9,OSM,PIK3R5,RAP2A,RGS16,TGFB2,TNFSF10,TNFSF13B,TNFSF4,VEGFD
α-Adrenergic Signaling	1.1	0.0642	-2.236	ADRA2A,Calm1 (includes others),GNAI2,GNG2,HRAS,PRKAR2B,RAP2A
Renal Cell Carcinoma Signaling	2.26	0.101	-2.236	FOS,HIF1A,HRAS,JUN,PDGFB,PIK3R5,RAP2A,UBD
Acute Myeloid Leukemia Signaling	1.9	0.0879	-2.236	CCND1,HRAS,PIK3R5,PML,RAP2A,REL,RELB,SPI1
Regulation of eIF4 and p70S6K Signaling	4.82	0.105	-2.236	EIF1AY,EIF3I,EIF4A1,HRAS,ITGA1,ITGA4,PIK3R5,RAP2A,RPS11,RPS15,RPS17,RPS2,RPS25,RPS28,RPS29,RPS3,RPS6,RPS9,RPSA
Actin Nucleation by ARP-WASP Complex	1.4	0.0753	-2.236	ARPC3,HRAS,ITGA1,ITGA4,RAP2A,RHOB,RND1
ERB2-ERBB3 Signaling	1.63	0.0923	-2.236	CCND1,HRAS,JUN,Nrg1,PIK3R5,RAP2A
GDNF Family Ligand-Receptor Interactions	1.34	0.0789	-2.236	FOS,HRAS,JUN,PDLIM7,PIK3R5,RAP2A
Gluconeogenesis I	2.86	0.2	-2.236	ALDOA,BPGM,ENO1,GAPDH,PGK1
PI3K/AKT Signaling	1.69	0.065	-2.236	CCND1,GDF15,HRAS,IL12RB2,IL1R2,IL3RA,IL6R,ITGA1,ITGA4,NFKBIA,RAP2A,REL,RELB
IL-2 Signaling	1.72	0.0968	-2.236	FOS,HRAS,JUN,PIK3R5,RAP2A,SOCS1
Neurotrophin/TRK Signaling	1.76	0.0897	-2.236	CREB3L1,FOS,HRAS,JUN,NTRK1,PIK3R5,RAP2A
TEC Kinase Signaling	0	0.0329	-2.309	ACTA2,ACTB,ACTG1,ACTG2,FCER1G,FOS,GNAI2,GNG2,ITGA1,ITGA4,PIK3R5,REL,RELB,RHOB,RND1,STAT1,STAT2,STAT4,TNFSF10
IL-6 Signaling	4.44	0.116	-2.309	FOS,HRAS,HSPB1,IL1B,IL1R2,IL6R,JUN,LBP,MAP4K4,NFKBIA,PIK3R5,RAP2A,REL,RELB,SOCS1
Calcium-induced T Lymphocyte Apoptosis	0	0.0217	-2.333	Calm1 (includes others),FCER1G,H2-Eb2,HLA-A,HLA-DMA,HLA-DMB,HLA-DOA,HLA-DQA1,HLA-DQB1,HLA-DRB5
CDC42 Signaling	0.484	0.0382	-2.333	ARPC3,CFL1,FCER1G,FOS,H2-Eb2,H2-T22,H2-T24,HLA-A,HLA-DMA,HLA-DMB,HLA-DOA,HLA-DQA1,HLA-DQB1,HLA-DRB5,HLA-E,HLA-G,IQGAP2,ITGA1,ITGA4,JUN,MYL6,MYL9
G-Protein Coupled Receptor Signaling	1.2	0.0455	-2.335	ACKR3,ADRA2A,CALCRL,Calm1 (includes others),CCND1,CCR7,CCRL2,CNGB3,CREB3L1,FOS,FZD1,GNAI2,GNG2,GPR132,GPR183,GPRC5B,HRAS,JUN,MYL6,MYL9,NFKBIA,NPY1R,PIK3R5,PLCB4,PREX1,PRKAR2B,PTGER4,RAP2A,REL,RELB,RGS10,RGS16
Wound Healing Signaling Pathway	6.21	0.103	-2.353	ACTA2,CD70,COL13A1,COL4A2,COL5A3,COL6A3,FOS,HRAS,IL1B,IL1R2,JUN,MMP9,MST1R,NFKBIA,OSM,PDGFA,PDGFB,RAP2A,STAT1,TGFB2,TGFBR3,TNFSF10,TNFSF13B,TNFSF4,VEGFD,VIM
Dendritic Cell Maturation	1.24	0.047	-2.353	CCR7,CD40,COL5A3,CREB3L1,FCER1G,FSCN1,H2-Eb2,HLA-A,HLA-DMA,HLA-DMB,HLA-DOA,HLA-DQA1,HLA-DQB1,HLA-DRB5,HLA-E,HLA-G,IL1B,IRF8,NFKBIA,PIK3R5,PLCB4,REL,RELB,STAT1,STAT2,STAT4,TLR2,TLR3
Oxytocin Signaling Pathway	2.75	0.0709	-2.357	CACNB3,Calm1 (includes others),CREB3L1,FOS,GNAI2,GNG2,HRAS,HSPB1,KCNJ8,MYH10,MYH11,MYL6,MYL9,PIK3R5,PLA2G4A,PLCB4,PRKAR2B,RAP2A,REL,RELB
LPS-stimulated MAPK Signaling	2.61	0.106	-2.449	FOS,HRAS,JUN,LBP,NFKBIA,PIK3R5,RAP2A,REL,RELB
Renin-Angiotensin Signaling	1.63	0.0744	-2.449	FOS,HRAS,JUN,PIK3R5,PRKAR2B,RAP2A,REL,RELB,STAT1
Mitotic Roles of Polo-Like Kinase	2.11	0.104	-2.449	CCNB1,CCNB2,CDC20,CDK1,PLK1,PRC1,PTTG1
Gα12/13 Signaling	1.41	0.0677	-2.449	HRAS,JUN,MYL6,MYL9,NFKBIA,PIK3R5,RAP2A,REL,RELB
G Beta Gamma Signaling	0.553	0.0465	-2.449	CACNB3,GNAI2,GNG2,HRAS,PRKAR2B,RAP2A
Estrogen-Dependent Breast Cancer Signaling	2.68	0.108	-2.449	CCND1,CREB3L1,FOS,HRAS,JUN,PIK3R5,RAP2A,REL,RELB
Endocannabinoid Developing Neuron Pathway	1.15	0.063	-2.449	CCND1,CREB3L1,GNAI2,GNG2,HRAS,PIK3R5,PRKAR2B,RAP2A
Coronavirus Replication Pathway	2.39	0.133	-2.449	IFITM2,IFITM3,Ifitm6,TUBA1A,TUBB,TUBB3
CXCR4 Signaling	1.89	0.0714	-2.53	FOS,GNAI2,GNG2,HRAS,JUN,MYL6,MYL9,PIK3R5,PLCB4,RAP2A,RHOB,RND1
HMGB1 Signaling	4.75	0.108	-2.53	CD70,FOS,HRAS,IL1B,JUN,OSM,PIK3R5,RAP2A,REL,RELB,RHOB,RND1,SERPINE1,TGFB2,TNFSF10,TNFSF13B,TNFSF4,VCAM1
PI3K Signaling in B Lymphocytes	0	0.022	-2.53	BCL10,Calm1 (includes others),CD40,FOS,HRAS,JUN,MALT1,NFKBIA,PLCB4,PLEKHA4,RAP2A,REL,RELB
Hepatic Fibrosis Signaling Pathway	10.2	0.104	-2.596	ACTA2,CACNB3,Calm1 (includes others),CCN2,CCND1,CD40,COL5A3,CREB3L1,CYBB,FGFR1,FLT1,FOS,FZD1,GNAI2,HIF1A,HRAS,IL1B,IL1R2,ITGA1,ITGA4,JUN,MYL6,MYL9,NCF1,NFKBIA,PDGFA,PDGFB,PIK3R5,PRKAR2B,PTCH1,RAP2A,REL,RELB,RHOB,RND1,SERPINE1,TGFB2,TGFBR3,VCAM1,VEGFD,WNT10B,WNT2,WNT2B,WNT4
HGF Signaling	1.42	0.0682	-2.646	CCND1,ELF1,FOS,HRAS,ITGA1,ITGA4,JUN,PIK3R5,RAP2A
Glioma Invasiveness Signaling	2.47	0.11	-2.646	HRAS,MMP9,PIK3R5,RAP2A,RHOB,RND1,TIMP2,TIMP3
Serotonin Receptor Signaling	2.48	0.0597	-2.646	ADRA2A,CACNB3,Calm1 (includes others),CCR7,CREB3L1,GAP43,GCH1,GNAI2,GNG2,H3-3A/H3-3B,HIF1A,HMOX1,HRAS,IL1B,JUN,MMP9,NFKBIA,PIK3R5,PLA2G4A,PLCB4,PRKAR2B,PTGS1,RAP2A,RHOB,RND1,SQSTM1,TGFB2,TRPC6
Ephrin Receptor Signaling	2	0.0693	-2.646	ARPC3,CFL1,CREB3L1,EPHA7,GNAI2,GNG2,HRAS,ITGA1,ITGA4,MAP4K4,PDGFA,PDGFB,RAP2A,VEGFD
ICOS-ICOSL Signaling in T Helper Cells	0	0.0316	-2.714	Calm1 (includes others),CD40,FCER1G,H2-Eb2,HLA-A,HLA-DMA,HLA-DMB,HLA-DOA,HLA-DQA1,HLA-DQB1,HLA-DRB5,NFKBIA,PIK3R5,PLEKHA4,REL,RELB
VEGF Signaling	3.85	0.121	-2.714	ACTA2,ACTB,ACTG1,ACTG2,ACTN1,EIF1AY,FLT1,HIF1A,HRAS,PIK3R5,RAP2A,VEGFD
Pulmonary Fibrosis Idiopathic Signaling Pathway	10.3	0.117	-2.744	ACTA2,ACTB,ACTG1,ACTG2,ADAMTS1,AREG,AXL,BIRC5,CCN2,CCND1,COL13A1,COL4A2,COL5A3,COL6A3,FGFR1,FOS,FZD1,HRAS,IL1B,JUN,MMP23B,MMP9,NOTCH3,PDGFA,PDGFB,PIK3R5,RAP2A,REL,RELB,SERPINE1,TGFB2,TGFBR3,THBS1,VIM,WNT10B,WNT2,WNT2B,WNT4
PAK Signaling	2.16	0.0855	-2.828	CFL1,HRAS,ITGA1,ITGA4,MYL6,MYL9,PDGFA,PDGFB,PIK3R5,RAP2A
Glycolysis I	5.93	0.32	-2.828	ALDOA,BPGM,ENO1,GAPDH,PFKL,PGK1,PKM,TPI1
Th1 Pathway	6.74	0.148	-2.828	CD40,H2-Eb2,HLA-A,HLA-DMA,HLA-DMB,HLA-DOA,HLA-DQA1,HLA-DQB1,HLA-DRB5,IL12RB2,IL6R,IRF1,NOTCH3,PIK3R5,RUNX3,SOCS1,STAT1,STAT4
Role of Tissue Factor in Cancer	2.28	0.0725	-2.84	BIRC5,CCN2,CFL1,CSF1,F3,FLT1,FOS,HRAS,IL1B,JUN,MMP9,PIK3R5,RAP2A,TGFB2,TGFBR3
Regulation of IL-2 Expression in Activated and Anergic T Lymphocytes	0	0.026	-2.887	BCL10,Calm1 (includes others),FCER1G,FOS,HRAS,JUN,MALT1,NFKBIA,RAP2A,REL,RELB,TGFB2
Tumor Microenvironment Pathway	7.93	0.134	-2.985	CCND1,CSF1,CTLA4,FOS,HIF1A,HLA-A,HLA-E,HLA-G,HRAS,IL1B,IL6R,JUN,MMP23B,MMP9,OSM,PDGFA,PDGFB,PIK3R5,RAP2A,REL,RELB,TGFB2,TNC,VEGFD
Role Of Osteoclasts In Rheumatoid Arthritis Signaling Pathway	4.6	0.0841	-3	ADAM23,BIRC2,Calm1 (includes others),CCND1,COL13A1,COL4A2,COL5A3,COL6A3,CREB3L1,CSF1,FOS,GSN,HRAS,IL1B,IL1R2,JUN,MMP23B,MMP9,NFKBIA,PIK3R5,PTPN1,RAP2A,RHOB,RND1,SFRP2,SPI1
Leukocyte Extravasation Signaling	4.43	0.0984	-3	ACTA2,ACTB,ACTG1,ACTG2,ACTN1,CLDN1,CLDN10,CYBB,GNAI2,ITGA4,MMP23B,MMP9,MYL6,NCF1,PIK3R5,THY1,TIMP2,TIMP3,VCAM1
Regulation of Actin-based Motility by Rho	3.81	0.113	-3	ACTA2,ACTB,ACTG2,ARPC3,CFL1,GSN,ITGA1,ITGA4,MYL6,MYL9,PFN1,RHOB,RND1
Agrin Interactions at Neuromuscular Junction	3.26	0.13	-3	ACTA2,ACTB,ACTG1,ACTG2,HRAS,ITGA4,JUN,Nrg1,RAP2A
Paxillin Signaling	2.43	0.0935	-3	ACTA2,ACTB,ACTG1,ACTG2,ACTN1,HRAS,ITGA1,ITGA4,PIK3R5,RAP2A
B Cell Receptor Signaling	0	0.0189	-3	BCL10,Calm1 (includes others),CFL1,CREB3L1,HRAS,JUN,MALT1,NFKBIA,PIK3R5,RAP2A,REL,RELB
GP6 Signaling Pathway	1.52	0.0709	-3	Calm1 (includes others),COL13A1,COL4A2,COL5A3,COL6A3,FCER1G,PIK3R5,RASGRP2,SCHIP1
IL-4 Signaling	0.294	0.0347	-3.13	CCL11,COL13A1,COL4A2,COL5A3,COL6A3,CREB3L1,FCER1G,GNAI2,HLA-DMA,HLA-DMB,HLA-DOA,HLA-DQA1,HLA-DQB1,HLA-DRB5,HRAS,PIK3R5,RAP2A,SOCS1,TGFB2,TIMP3
Role of NFAT in Regulation of the Immune Response	0	0.0203	-3.153	Calm1 (includes others),FCER1G,FOS,GNAI2,GNG2,H2-Eb2,HLA-A,HLA-DMA,HLA-DMB,HLA-DOA,HLA-DQA1,HLA-DQB1,HLA-DRB5,HRAS,JUN,NFKBIA,PIK3R5,PLCB4,RAP2A,REL,RELB
Signaling by Rho Family GTPases	5.24	0.0936	-3.153	ACTA2,ACTB,ACTG1,ACTG2,ARPC3,CDC42EP3,CFL1,CYBB,DES,FOS,GNAI2,GNG2,ITGA1,ITGA4,JUN,MYL6,MYL9,NCF1,PIK3R5,REL,RELB,RHOB,RND1,STMN1,VIM
RHOA Signaling	1.99	0.0806	-3.162	ACTA2,ACTB,ACTG1,ACTG2,ARPC3,CDC42EP3,CFL1,MYL6,MYL9,PFN1
TGF-β Signaling	4.63	0.135	-3.162	BMP4,FOS,HOXC9,HRAS,INHBA,IRF7,JUN,PITX2,RAP2A,RUNX3,SERPINE1,TGFB2,VDR
Actin Cytoskeleton Signaling	4.43	0.0902	-3.3	ACTA2,ACTB,ACTG1,ACTG2,ACTN1,ARPC3,CFL1,GSN,HRAS,IQGAP2,ITGA1,ITGA4,LBP,MYH10,MYH11,MYL6,MYL9,PDGFA,PDGFB,PFN1,PIK3R5,RAP2A
ILK Signaling	7.57	0.124	-3.3	ACTA2,ACTB,ACTG1,ACTG2,ACTN1,CCND1,CFL1,CREB3L1,FBLIM1,FOS,HIF1A,JUN,MMP9,MYH10,MYH11,MYL6,MYL9,PIK3R5,PPP1R14B,REL,RELB,RHOB,RND1,VEGFD,VIM
PKCθ Signaling in T Lymphocytes	0.35	0.0358	-3.638	BCL10,CACNB3,FCER1G,FOS,H2-Eb2,HLA-A,HLA-DMA,HLA-DMB,HLA-DOA,HLA-DQA1,HLA-DQB1,HLA-DRB5,HRAS,JUN,MALT1,NFKBIA,PIK3R5,RAP2A,REL,RELB
Integrin Signaling	2.98	0.0802	-3.873	ACTA2,ACTB,ACTG1,ACTG2,ACTN1,ARPC3,GSN,HRAS,ITGA1,ITGA4,MYL9,PDGFB,PFN1,PIK3R5,RAP2A,RHOB,RND1
EIF2 Signaling	14.6	0.163	-4.146	ACTA2,ACTB,ACTG2,CCND1,DDIT3,EIF1AY,EIF2AK2,EIF3I,EIF4A1,HRAS,PIK3R5,PPP1CA,RAP2A,RPL10,RPL10A,RPL12,RPL13A,RPL14,RPL15,RPL26,RPL3,RPL35,RPL4,RPL41,RPL5,RPL8,RPS11,RPS15,RPS17,RPS2,RPS25,RPS28,RPS29,RPS3,RPS6,RPS9,RPSA
